# Supplementary material for: ‘Glocal’ Robustness Analysis and Model Discrimination for Circadian Oscillators
Source: PubMed Central journal article supplement (PMC2758577; doi:10.1371/journal.pcbi.1000534), 2009-10-16

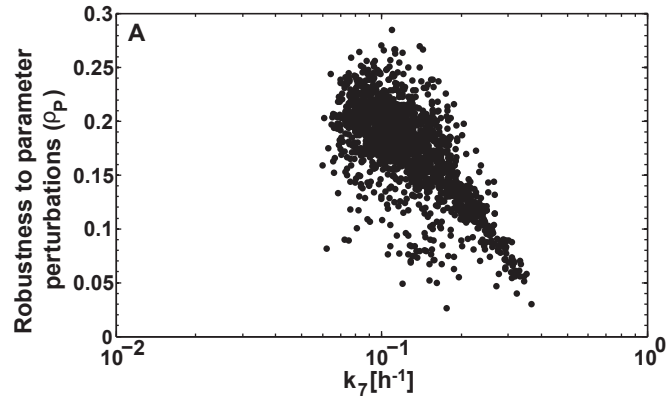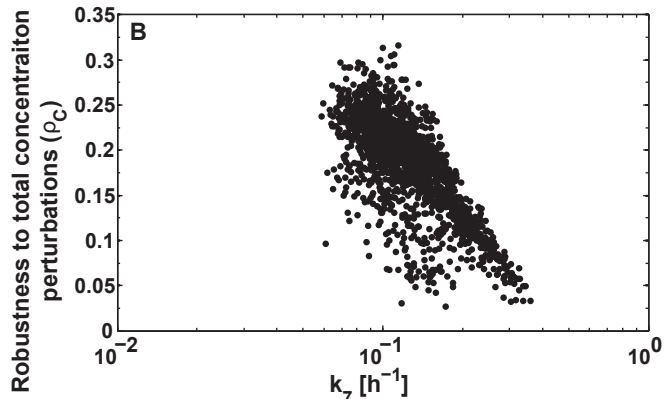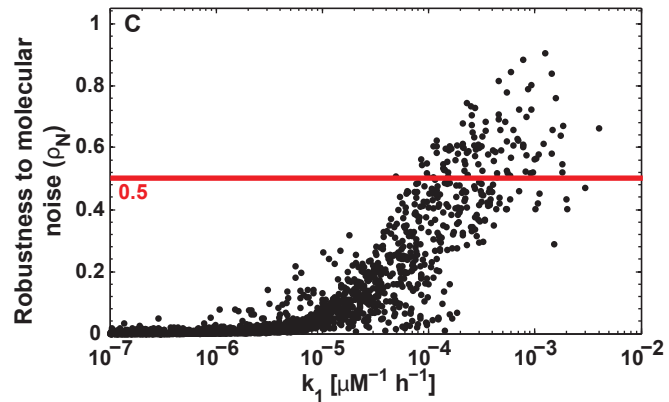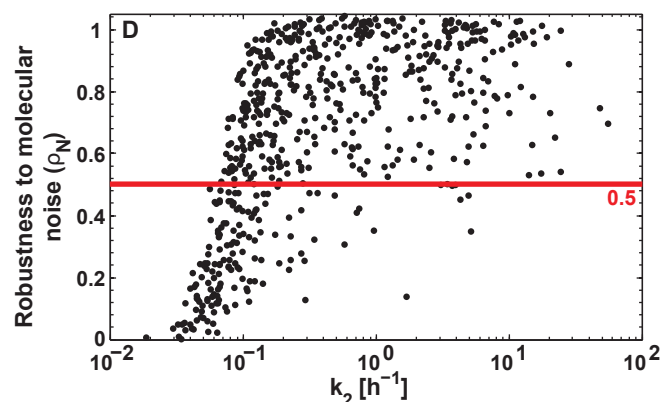

Supplement: pcbi.1000534.s002.pdf [file pcbi.1000534.s002.pdf]
